# Supplementary material for: Impact of on-site clinical genetics consultations on diagnostic rate in children and young adults with autism spectrum disorder
Source: Mol Autism. 2019 Aug 7;10:33. doi: 10.1186/s13229-019-0284-2 (PMC6686526; doi:10.1186/s13229-019-0284-2)
Supplement: Supplementary file 1 — Table S1. List of 439 known intellectual disability/ASD genes or candidate genes tested by panel resequencing. (XLSX 196 kb) [file 13229_2019_284_MOESM1_ESM.xlsx]

## Sheet: Table S1
Table S1. List of 439 known intellectual disability/ASD genes or candidate genes tested by panel resequencing.
HGNC Gene Symbol	OMIM Link	RefSeq Transcript Number	Ensembl Transcript Number	CCDS Number	Transcript Physical Position GRCH37/hG19	cDNA Size bp
ABCC9	601439	NM_005691	ENST00000261201	CCDS8694.1	chr12:21958108-22089628	4650
ABCC9		NM_020297	ENST00000261200	CCDS8693.1	chr12:21950324-22089628	138
ABCD1	300371	NM_000033	ENST00000218104	CCDS14728.1	chrX:152990323-153010216	2238
ACSL4	300157	NM_022977	ENST00000340800	CCDS14548.1	chrX:108884564-108976621	2136
ACTB	102630	NM_001101	ENST00000331789	CCDS5341.1	chr7:5566779-5570232	1128
ACTG1	102630	NM_001614	ENST00000331925	CCDS11782.1	chr17:79476997-79479892	1228
ACY1	104620	NM_000666	ENST00000404366	CCDS2844.1	chr3:52017300-52023218	1227
ADAT3	615302	NM_138422	ENST00000329478	CCDS12076.2	chr19:1905213-1913446	1104
ADGRG1 (GPR56)	604110	NM_005682	ENST00000568909	CCDS32460.1	chr16:57653910-57698944	2082
ADNP	611386	NM_015339	ENST00000396029	CCDS13433.1	chr20:49505455-49547527	3309
ADRA2B	104260	NM_000682	ENST00000409345	CCDS56129.1	chr2:96778623-96781984	1344
ADSL	608222	NM_000026	ENST00000216194	CCDS14001.1	chr22:40742504-40762575	1455
AFF2	300806	NM_002025	ENST00000370460	CCDS14684.1	chrX:147582139-148082193	3936
AFF2		NM_001170628	ENST00000286437	CCDS55521.1	chrX:147800615-148082193	51
AGO1 (EIF2C1)	606228	NM_012199	ENST00000373204	CCDS398.1	chr1:36348796-36389899	2574
AGTR2	300034	NM_000686	ENST00000371906	CCDS14569.1	chrX:115301958-115306225	1092
AHDC1	615790	NM_001029882	ENST00000374011	CCDS30652.1	chr1:27860756-27930005	4812
AHI1	608894	NM_017651	ENST00000457866	CCDS47483.1	chr6:135605110-135818903	3591
AHI1		NM_001134832	ENST00000327035	CCDS47484.1	chr6:135708922-135818903	53
ALDH3A2	609523	NM_001031806	ENST00000339618	CCDS32589.1	chr17:19552064-19580904	1527
ALDH3A2		NM_000382	ENST00000176643	CCDS11210.1	chr17:19552064-19580908	15
ALG13	300776	NM_001099922	ENST00000394780	CCDS55477.1	chrX:110924346-111003875	3414
ALG13		NM_018466	ENST00000371979	CCDS14559.1	chrX:110924346-110932027	115
ANK3	600465	NM_020987	ENST00000280772	CCDS7258.1	chr10:61786056-62149634	13134
ANK3		NM_001204403	ENST00000373827	CCDS55712.1	chr10:61786056-62493284	405
ANK3		NM_001149	ENST00000355288	CCDS7259.1	chr10:61786056-61900774	16
ANK3		NM_001204404	ENST00000503366	CCDS55711.1	chr10:61786056-62332714	107
ANKRD11	611192	NM_013275	ENST00000301030	CCDS32513.1	chr16:89334029-89556969	7992
AP1S2	300629	NM_003916	ENST00000329235	CCDS14173.1	chrX:15843929-15873137	474
AP3B2	602166	NM_001278512	ENST00000535359	CCDS61737.1	chr15:83328033-83378660	3306
AP4B1	607245	NM_006594	ENST00000256658	CCDS865.1	chr1:114437371-114447741	2220
AP4E1	607244	NM_007347	ENST00000261842	CCDS32240.1	chr15:51200869-51298097	3414
AP4M1	602296	NM_004722	ENST00000359593	CCDS5685.1	chr7:99699130-99704803	1362
AP4S1	607243	NM_007077	ENST00000216366	CCDS9642.1	chr14:31494676-31555008	480
AP4S1		NM_001128126	ENST00000542754	CCDS45093.1	chr14:31494676-31565656	129
AP4S1		NM_001254727	ENST00000334725	CCDS58309.1	chr14:31494676-31555008	84
ARFGEF2	605371	NM_006420	ENST00000371917	CCDS13411.1	chr20:47538275-47653230	5358
ARHGEF6	300267	NM_004840	ENST00000250617	CCDS14660.1	chrX:135747712-135863503	2331
ARHGEF9	300429	NM_015185	ENST00000253401	CCDS35315.1	chrX:62854848-62975031	1551
ARHGEF9		NM_001173479	ENST00000437457	CCDS55430.1	chrX:62854848-63005426	50
ARID1A	603024	NM_006015	ENST00000324856	CCDS285.1	chr1:27022522-27108601	6858
ARID1B	614556	NM_020732	ENST00000346085	CCDS55072.1	chr6:157099064-157531913	6750
ARID2	609539	NM_152641	ENST00000334344	CCDS31783.1	chr12:46123620-46301819	5508
ARX	300382	NM_139058	ENST00000379044	CCDS14215.1	chrX:25021813-25034065	1689
ASH1L	607999	NM_018489	ENST00000392403	CCDS1113.2	chr1:155305052-155532324	8895
ASNS	108370	NM_133436	ENST00000394309	CCDS5652.1	chr7:97481429-97501477	1686
ASPM	605481	NM_018136	ENST00000367409	CCDS1389.1	chr1:197053257-197115824	10434
ASXL1	612990	NM_015338	ENST00000375687	CCDS13201.1	chr20:30946147-31027122	4626
ASXL1		NM_001164603	ENST00000375689		chr20:30946147-30960352	6
ASXL3	615115	NM_030632	ENST00000269197	CCDS45847.1	chr18:31158541-31331158	6747
ATP6AP2	300556	NM_005765	ENST00000378438	CCDS14252.1	chrX:40440216-40465888	1053
ATP6V1B2	606939	NM_001693	ENST00000276390	CCDS6014.1	chr8:20054704-20079207	1536
ATP7A	300011	NM_000052	ENST00000341514	CCDS35339.1	chrX:77166153-77305892	4503
ATRX	300032	NM_000489	ENST00000373344	CCDS14434.1	chrX:76760356-77041755	7479
AUTS2	607270	NM_015570	ENST00000342771	CCDS5539.1	chr7:69063906-70257885	3780
AUTS2		NM_001127232	ENST00000403018	CCDS47602.1	chr7:69063905-69755772	141
BCKDK	614901	NM_005881	ENST00000219794	CCDS10705.1	chr16:31119615-31124112	1239
BCL11A	606557	NM_022893	ENST00000335712	CCDS1862.1	chr2:60684329-60780633	2508
BCL11A		NM_018014	ENST00000356842	CCDS1861.1	chr2:60678302-60780633	92
BCL11A		NM_138559	ENST00000359629	CCDS46295.1	chr2:60678302-60780633
BCOR	300485	NM_001123385	ENST00000378444	CCDS48093.1	chrX:39910499-39956719	5268
BRAF	164757	NM_004333	ENST00000288602	CCDS5863.1	chr7:140433813-140624564	2301
BRF1	604902	NM_001519	ENST00000546474	CCDS10001.1	chr14:105675623-105767329	2034
BRF1		NM_001242786	ENST00000440513	CCDS55951.1	chr14:105675623-105781914	56
BRF1		NM_001242790	ENST00000548421	CCDS55953.1	chr14:105722523-105767329	146
BRPF1	602410	NM_001003694	ENST00000383829	CCDS33692.1	chr3:9773434-9789699	3663
BRWD3	300553	NM_153252	ENST00000373275	CCDS14447.1	chrX:79924987-80065233	5409
C12orf4	616082	NM_020374	ENST00000261250	CCDS8528.1	chr12:4596896-4647674	1659
C12orf57	615140	NM_138425	ENST00000229281	CCDS8571.1	chr12:7053203-7055165	381
CACNA1C	114205	NM_001167624	ENST00000399617	CCDS53733.1	chr12:2162451-2807115	6522
CACNA1C		NM_001129827	ENST00000347598	CCDS44788.1	chr12:2162416-2807115	104
CACNA1C		NM_001129829	ENST00000344100	CCDS44792.1	chr12:2162416-2807115	66
CACNA1C		NM_001167625	ENST00000399634		chr12:2162416-2807115	213
CACNA1D	114206	NM_000720	ENST00000288139	CCDS2872.1	chr3:53529076-53846492	6946
CACNA1D		NM_001128840	ENST00000350061	CCDS46848.1	chr3:53529076-53846492	104
CACNA1F	300110	NM_005183	ENST00000376265	CCDS35253.1	chrX:49061523-49089833	5934
CACNA1F		NM_001256790	ENST00000376251	CCDS59166.1	chrX:49061523-49089833	40
CACNA1G	604065	NM_018896	ENST00000359106	CCDS45730.1	chr17:48638429-48704832	7134
CADPS2	609978	NM_017954	ENST00000449022	CCDS55158.1	chr7:121958478-122526813	3891
CADPS2		NM_001009571	ENST00000412584	CCDS47691.1	chr7:121958478-122526813	15
CAMK2G	602123	NM_172171	ENST00000322680	CCDS7338.1	chr10:75572259-75634349	1671
CAMK2G		NM_172169	ENST00000322635	CCDS7337.1	chr10:75572259-75634349	63
CAMTA1	611501	NM_015215	ENST00000303635	CCDS30576.1	chr1:6845384-7829766	5022
CAMTA1		NM_001195563	ENST00000473578	CCDS55574.1	chr1:6845384-6932107	9
CAMTA1		NM_001242701	ENST00000557126	CCDS55575.1	chr1:6845384-6948261	72
CAPN10	605286	NM_023083	ENST00000391984	CCDS42838.1	chr2:241526133-241538526	2019
CASC5 (KNL1)	609173	NM_170589	ENST00000346991	CCDS42023.1	chr15:40886447-40954881	7029
CASK	300172	NM_003688	ENST00000378166	CCDS14257.1	chrX:41374189-41782287	2766
CC2D1A	610055	NM_017721	ENST00000318003	CCDS42512.1	chr19:14016956-14041693	2856
CCBE1	612753	NM_133459	ENST00000439986	CCDS32838.1	chr18:57098171-57364644	1221
CCDC22	300859	NM_014008	ENST00000376227	CCDS14322.1	chrX:49091927-49106987	1884
CDH15	114019	NM_004933	ENST00000289746	CCDS10976.1	chr16:89238163-89261900	2445
CDK5RAP2	608201	NM_018249	ENST00000349780	CCDS6823.1	chr9:123151147-123342448	5682
CDK6	603368	NM_001259	ENST00000265734	CCDS5628.1	chr7:92234235-92463231	981
CDKL5	300203	NM_003159	ENST00000379996	CCDS14186.1	chrX:18443725-18671749	3093
CENPJ	609279	NM_018451	ENST00000381884	CCDS9310.1	chr13:25456412-25497027	4017
CEP135	611423	NM_025009	ENST00000257287	CCDS33986.1	chr4:56814974-56899529	3423
CEP152	613529	NM_001194998	ENST00000380950	CCDS58361.1	chr15:49030135-49103343	5133
CHAMP1	616327	NM_032436	ENST00000361283	CCDS9545.1	chr13:115079965-115092803	2439
CHD2	602119	NM_001271	ENST00000394196	CCDS10374.2	chr15:93443551-93571237	5487
CHD4	603277	NM_001273	ENST00000357008	CCDS8552.1	chr12:6679248-6716599	5739
CHD7	608892	NM_017780	ENST00000423902	CCDS47865.1	chr8:61591324-61780586	8994
CHD8	610528	NM_020920	ENST00000430710	CCDS45081.1	chr14:21853353-21905457	6909
CHD8		NM_001170629	ENST00000399982	CCDS53885.1	chr14:21853353-21899867	843
CKAP2L	616174	NM_152515	ENST00000302450	CCDS2100.1	chr2:113493927-113522254	2238
CLCN4	302910	NM_001830	ENST00000380833	CCDS14137.1	chrX:10124985-10205699	2283
CLIC2	300138	NM_001289	ENST00000369449	CCDS14767.1	chrX:154505496-154563990	744
CLIP1	179838	NM_001247997	ENST00000540338	CCDS58285.1	chr12:122755981-122907116	4317
CLPB	616254	NM_030813	ENST00000294053	CCDS8215.1	chr11:72003470-72145728	2124
CLPB		NM_001258394	ENST00000437826	CCDS58152.1		107
CNKSR2	300724	NM_014927	ENST00000379510	CCDS14198.1	chrX:21392416-21672813	3105
CNKSR2		NM_001168648	ENST00000279451	CCDS55387.1	chrX:21392416-21660980	5
CNNM2	607803	NM_017649	ENST00000369878	CCDS44474.1	chr10:104678075-104838344	2628
CNNM2		NM_199077	ENST00000369875	CCDS7543.1	chr10:104678075-104687375	38
CNTNAP2	604569	NM_014141	ENST00000361727	CCDS5889.1	chr7:145813453-148118088	3996
COG6	606977	NM_020751	ENST00000455146	CCDS9370.1	chr13:40229764-40326765	1974
COG6		NM_001145079	ENST00000416691	CCDS45042.1	chr13:40229764-40365802	22
COLEC11	612502	NM_024027	ENST00000349077	CCDS1649.1	chr2:3642422-3692234	816
COLEC11		NM_199235	ENST00000236693	CCDS1650.1	chr2:3642422-3692234	79
COLEC11		NM_001255985	ENST00000418971	CCDS58689.1	chr2:3649496-3692234	16
COLEC11		NM_001255986	ENST00000403096	CCDS58691.1	chr2:3653642-3692234	52
CRADD	603454	NM_003805	ENST00000332896	CCDS9048.1	chr12:94071151-94244531	600
CRADD		NM_001320101	ENST00000552033		chr12:94071147-94132412	51
CRADD		NM_001320100	ENST00000548483		chr12:94071147-94288616	70
CRBN	609262	NM_016302	ENST00000231948	CCDS2562.1	chr3:3191317-3221401	1329
CREBBP	600140	NM_004380	ENST00000262367	CCDS10509.1	chr16:3775056-3930121	7329
CSNK2A1	115440	NM_177559	ENST00000217244	CCDS13003.1	chr20:463338-524482	1176
CTCF	604167	NM_006565	ENST00000264010	CCDS10841.1	chr16:67596310-67673088	2184
CTDP1	604927	NM_004715	ENST00000299543	CCDS12017.1	chr18:77439801-77514510	2886
CTNNB1	116806	NM_001904	ENST00000349496	CCDS2694.1	chr3:41240942-41281939	2346
CTNND2	604275	NM_001332	ENST00000304623	CCDS3881.1	chr5:10971954-11904155	3678
CUL4B	300304	NM_003588	ENST00000404115	CCDS35379.1	chrX:119658446-119709684	2742
CYB5R3	613213	NM_001171660	ENST00000361740	CCDS54535.1	chr22:43013846-43040640	1005
CYB5R3		NM_000398	ENST00000352397	CCDS33658.1	chr22:43013846-43045405	21
DCAF1 (C2orf37)	612515	NM_025000	ENST00000375255	CCDS2243.2	chr2:172290761-172341562	1563
DCHS1	603057	NM_003737	ENST00000299441	CCDS7771.1	chr11:6642555-6677080	9897
DCPS	610534	NM_014026	ENST00000263579	CCDS8473.1	chr11:126173647-126215648	1014
DCX	300121	NM_000555	ENST00000338081	CCDS14556.1	chrX:110537007-110654374	1326
DDX1	601257	NM_004939	ENST00000233084	CCDS1686.1	chr2:15731745-15771235	2223
DDX3X	300160	NM_001356	ENST00000399959	CCDS43931.1	chrX:41192561-41209540	1989
DEAF1	602635	NM_021008	ENST00000382409	CCDS31327.1	chr11:644220-695754	1698
DEAF1		NM_001293634	ENST00000338675		chr11:644220-695754	42
DHCR7	602858	NM_001360	ENST00000355527	CCDS8200.1	chr11:71145457-71159477	1428
DHTKD1	614984	NM_018706	ENST00000263035	CCDS7087.1	chr10:12110916-12165227	2760
DIAPH1	602121	NM_005219	ENST00000398557	CCDS43374.1	chr5:140894588-140998622	3819
DIAPH1		NM_001314007	ENST00000448451		chr5:140894588-140998622	53
DKC1	300126	NM_001363	ENST00000369550	CCDS14761.1	chrX:153991017-154005964	1545
DLG3	300189	NM_021120	ENST00000374360	CCDS14403.1	chrX:69664705-69725339	2454
DLG3		NM_020730	ENST00000374355	CCDS43967.1	chrX:69672155-69725339	276
DLG4	602887	NM_001365	ENST00000399510	CCDS45599.1	chr17:7093210-7123369	2304
DLG4		NM_001321075	ENST00000399506		chr17:7093209-7120658	30
DNM1	602377	NM_004408	ENST00000372923	CCDS6895.1	chr9:130965634-131017527	2595
DNM1		NM_001005336	ENST00000341179	CCDS43882.1	chr9:130965634-131017527	22
DNM1		NM_001288737	ENST00000475805		chr9:130965634-131017527	139
DNMT3A	602769	NM_022552	ENST00000321117	CCDS33157.1	chr2:25455830-25564784	2739
DNMT3A		NM_175630	ENST00000406659	CCDS46232.1	chr2:25504321-25565459	53
DNMT3A		NM_153759	ENST00000380746	CCDS1718.2	chr2:25455830-25475184	72
DNMT3B	602900	NM_006892	ENST00000328111	CCDS13205.1	chr20:31350191-31397162	2562
DNMT3B		NM_175850	ENST00000201963	CCDS13204.1		30
DOCK7	615730	NM_001271999	ENST00000251157	CCDS60156.1	chr1:62920397-63154039	6390
DOCK7		NM_033407	ENST00000340370	CCDS30734.1	chr1:62920397-63154039	15
DOCK7		NM_001272002	ENST00000404627	CCDS60157.1	chr1:63049776-63154039	99
DOCK8	611432	NM_203447	ENST00000453981	CCDS6440.2	chr9:214865-465259	6300
DPAGT1	191350	NM_001382	ENST00000354202	CCDS8411.1	chr11:118967213-118972785	1227
DPH1	603527	NM_001383	ENST00000263083	CCDS42228.1	chr17:1933431-1946725	1332
DPP6	126141	NM_130797	ENST00000377770		chr7:153749503-154686000	2598
DPP6		NM_001936	ENST00000332007		chr7:154002297-154686000	57
DPP6		NM_001039350	ENST00000404039		chr7:153584182-154686000	51
DPP6		NM_001290253	ENST00000406326		chr7:153749503-154380340	435
DYNC1H1	600112	NM_001376	ENST00000360184	CCDS9966.1	chr14:102430865-102517135	13941
DYRK1A	600855	NM_001396	ENST00000398960	CCDS42925.1	chr21:38792602-38887679	2292
DYRK1A		NM_101395	ENST00000338785	CCDS42926.1	chr21:38739859-38887679	69
EBF3	607407	NM_001005463	ENST00000368648	CCDS31314.1	chr10:131633496-131762091	1656
EEF1A2	602959	NM_001958	ENST00000217182	CCDS13522.1	chr20:62119365-62130668	1392
EHMT1	607001	NM_024757	ENST00000460843	CCDS7050.2	chr9:140513444-140730578	3897
EHMT1		NM_001145527	ENST00000462484	CCDS56595.1	chr9:140513444-140678845	45
EHMT2	604599	NM_001289413	ENST00000375528		chr6:31847536-31864983	3702
EHMT2		NM_006709	ENST00000375537	CCDS4725.1	chr6:31847536-31865484	144
EIF2S3	300161	NM_001415	ENST00000253039	CCDS14210.1	chrX:24073065-24096927	1419
ELOVL4	605512	NM_022726	ENST00000369816	CCDS4992.1	chr6:80624529-80657315	945
ELP2	616054	NM_001242875	ENST00000442325	CCDS56065.1	chr18:33709837-33757885	2676
EML1	602033	NM_001008707	ENST00000334192	CCDS32154.1	chr14:100259745-100408395	2505
EP300	602700	NM_001429	ENST00000263253	CCDS14010.1	chr22:41488614-41576081	7245
ERCC6	609413	NM_000124	ENST00000355832	CCDS7229.1	chr10:50662526-50747169	4482
ERLIN2	611605	NM_007175	ENST00000276461	CCDS6095.1	chr8:37594097-37615319	1020
ERLIN2		NM_001003790	ENST00000335171	CCDS34879.1	chr8:37594197-37604071	35
EZH2	601573	NM_004456	ENST00000320356	CCDS5891.1	chr7:148504464-148581441	2256
FAR1	616107	NM_032228	ENST00000354817	CCDS7813.1	chr11:13690206-13753893	1548
FAT4	612411	NM_024582	ENST00000394329	CCDS3732.3	chr4:126237567-126414087	14946
FBN1	134797	NM_000138	ENST00000316623	CCDS32232.1	chr15:48700503-48937985	8616
FGD1	300546	NM_004463	ENST00000375135	CCDS14359.1	chrX:54471887-54522599	2886
FIBP	608296	NM_198897	ENST00000338369	CCDS8119.1	chr11:65651211-65656010	1095
FLNA	300017	NM_001110556	ENST00000369850	CCDS48194.1	chrX:153576900-153603006	7944
FMN2	606373	NM_020066	ENST00000319653	CCDS31069.2	chr1:240255180-240638467	5169
FMR1	309550	NM_002024	ENST00000370475	CCDS14682.1	chrX:146993469-147032647	1899
FOLR1	136430	NM_016729	ENST00000393676	CCDS8211.1	chr11:71903173-71907367	774
FOXG1	164874	NM_005249	ENST00000313071	CCDS9636.1	chr14:29236278-29239483	1470
FOXP1	605515	NM_032682	ENST00000318789	CCDS2914.1	chr3:71003865-71633140	2034
FOXP1		NM_001012505	ENST00000318779	CCDS33785.1	chr3:71247034-71633140	165
FOXP1		NM_001244815	ENST00000491238	CCDS58837.1	chr3:71003865-71180092	186
FOXP2	605317	NM_148898	ENST00000408937	CCDS43635.1	chr7:114055052-114333827	2223
FOXP2		NM_148900	ENST00000403559	CCDS55154.1	chr7:114055052-114333827	51
FOXP2		NM_148899	ENST00000360232	CCDS5761.2	chr7:114055052-114333827	33
FRMPD4	300838	NM_014728	ENST00000380682	CCDS35201.1	chrX:12156585-12742642	3969
FRRS1L	604574	NM_014334	ENST00000561981	CCDS35098.1	chr9:111892573-111929571	1035
FTSJ1	300499	NM_012280	ENST00000348411	CCDS14294.1	chrX:48334409-48344752	990
GAMT	601240	NM_138924	ENST00000447102	CCDS45897.1	chr19:1397810-1401569	810
GAMT		NM_000156	ENST00000252288	CCDS12064.1	chr19:1397025-1401569	141
GATAD2B	614998	NM_020699	ENST00000368655	CCDS1054.1	chr1:153777203-153895451	1782
GATM	602360	NM_001482	ENST00000396659	CCDS10122.1	chr15:45653322-45670980	1272
GDI1	300104	NM_001493	ENST00000447750	CCDS35452.1	chrX:153665259-153671814	1344
GK	300474	NM_001128127	ENST00000378943	CCDS48090.1	chrX:30671476-30749577	1662
GK		NM_203391	ENST00000378946	CCDS14225.1	chrX:30671476-30749577	18
GMPPA	615495	NM_205847	ENST00000358215	CCDS2441.1	chr2:220363617-220371718	1263
GPC3	300037	NM_001164617	ENST00000394299	CCDS55496.1	chrX:132669776-133119673	1812
GPC4	300168	NM_001448	ENST00000370828	CCDS14637.1	chrX:132435064-132549205	1671
GRIA1	138248	NM_001258021	ENST00000518783	CCDS58987.1	chr5:152871732-153193429	2751
GRIA1		NM_000827	ENST00000285900	CCDS4322.1	chr5:152870084-153193429	82
GRIA1		NM_001258022	ENST00000448073	CCDS58988.1	chr5:152871732-153193429	115
GRIA3	305915	NM_000828	ENST00000264357	CCDS14604.1	chrX:122318096-122624766	2685
GRIA3		NM_001256743	ENST00000371264		chrX:122318096-122338533	233
GRIA3		NM_007325	ENST00000371256	CCDS14605.1		115
GRIK2	138244	NM_021956	ENST00000421544	CCDS5048.1	chr6:101846861-102517958	2727
GRIK2		NM_175768	ENST00000413795	CCDS5049.1		48
GRIK2		NM_001166247	ENST00000369138	CCDS55045.1		117
GRIN1	138249	NM_001185090	ENST00000371553	CCDS55354.1	chr9:140033609-140063214	2751
GRIN1		NM_007327	ENST00000371561	CCDS7031.1	chr9:140033609-140063214	117
GRIN2A	138253	NM_000833	ENST00000396573	CCDS10539.1	chr16:9847265-10276611	4395
GRIN2B	138252	NM_000834	ENST00000609686	CCDS8662.1	chr12:13714410-14133022	4455
H3F3B	601058	NM_005324	ENST00000254810	CCDS11729.1	chr17:73772515-73776016	411
HCCS	300056	NM_005333	ENST00000321143	CCDS14139.1	chrX:11129406-11141204	807
HCFC1	300019	NM_005334	ENST00000310441	CCDS44020.1	chrX:153213008-153236819	6108
HDAC4	605314	NM_006037	ENST00000345617	CCDS2529.1	chr2:239969864-240322643	3255
HDAC6	300272	NM_006044	ENST00000376619	CCDS14306.1	chrX:48660487-48683380	3648
HDAC6		NM_001321225	ENST00000444343			46
HDAC8	300269	NM_018486	ENST00000373573	CCDS14420.1	chrX:71549366-71792953	1134
HDAC8		NM_001166422	ENST00000373556	CCDS55452.1	chrX:71787432-71792953	40
HDAC8		NM_001166419	ENST00000439122	CCDS55451.1	chrX:71693266-71792953	34
HECW2	-	NM_020760	ENST00000260983	CCDS33354.1	chr2:197063975-197457335	4719
HERC1	605109	NM_003922	ENST00000443617	CCDS45277.1	chr15:63900817-64126147	14586
HERC2	605837	NM_004667	ENST00000261609	CCDS10021.1	chr15:28356183-28567298	14505
HIVEP2	143054	NM_006734	ENST00000367603	CCDS43510.1	chr6:143072604-143266338	7341
HNMT	605238	NM_006895	ENST00000280097	CCDS2181.1	chr2:138721808-138773934	879
HNMT		NM_001024074	ENST00000280096	CCDS33297.1	chr2:138721808-138725014	19
HNMT		NM_001024075	ENST00000329366	CCDS33296.1	chr2:138721808-138739248	191
HNRNPH2	300610	NM_019597	ENST00000316594	CCDS14485.1	chrX:100663121-100669128	1350
HNRNPK	600712	NM_002140	ENST00000376263	CCDS6668.1	chr9:86582998-86595697	1395
HNRNPK		NM_031262	ENST00000376264	CCDS6667.1	chr9:86582998-86595697	31
HNRNPU	602869	NM_031844	ENST00000283179	CCDS41479.1	chr1:245013602-245027827	2478
HPRT1	308000	NM_000194	ENST00000298556	CCDS14641.1	chrX:133594175-133634698	657
HRAS	190020	NM_005343	ENST00000451590	CCDS7698.1	chr11:532242-535550	570
HRAS		NM_176795	ENST00000417302	CCDS7699.1	chr11:532242-535550	63
HSD17B10	300256	NM_004493	ENST00000168216	CCDS14354.1	chrX:53458206-53461323	786
HTR7	182137	NM_019859	ENST00000336152	CCDS7408.1	chr10:92500576-92617671	1440
HUWE1	300697	NM_031407	ENST00000262854	CCDS35301.1	chrX:53559057-53713674	13125
IGBP1	300139	NM_001551	ENST00000356413	CCDS14396.1	chrX:69353318-69386173	1020
IL1RAPL1	300206	NM_014271	ENST00000378993	CCDS14218.1	chrX:28605681-29974017	2091
IMPA1	602064	NM_001144878	ENST00000449740	CCDS47883.1	chr8:82569151-82598589	1011
IQSEC2	300522	NM_001111125	ENST00000396435	CCDS48130.1	chrX:53262058-53350522	4467
IQSEC2		NM_015075	ENST00000375365	CCDS35298.1	chrX:53262058-53310796	122
JMJD1C	604503	NM_032776	ENST00000399262	CCDS41532.1	chr10:64926981-65225761	7623
KANK1	607704	NM_015158	ENST00000382303	CCDS34976.1	chr9:504695-746106	4059
KANSL1	612452	NM_015443	ENST00000572904	CCDS11503.1	chr17:44107282-44270272	3318
KAT6A	601408	NM_006766	ENST00000265713	CCDS6124.1	chr8:41786997-41909544	6015
KAT6A		NM_001305878	ENST00000485568		chr8:41799567-41909544	12
KAT6B	605880	NM_012330	ENST00000287239	CCDS7345.1	chr10:76586171-76792380	6222
KATNAL2	614697	NM_031303	ENST00000245121	CCDS32828.1	chr18:44526787-44628614	1401
KCNH1	603305	NM_172362	ENST00000271751	CCDS1496.1	chr1:210851657-211307457	2970
KCNJ10	602208	NM_002241	ENST00000368089	CCDS1193.1	chr1:160007257-160040051	1140
KCNJ6	600877	NM_002240	ENST00000609713	CCDS42927.1	chr21:38996525-39288741	1272
KCNQ2	602235	NM_172107	ENST00000359125	CCDS13520.1	chr20:62037542-62103993	2619
KCNQ2		NM_172109	ENST00000344425	CCDS13521.1	chr20:62065032-62103993	49
KCNQ3	602232	NM_004519	ENST00000388996	CCDS34943.1	chr8:133133105-133493004	2619
KCNQ3		NM_001204824	ENST00000521134	CCDS56554.1	chr8:133133105-133459509	26
KDM5C	314690	NM_004187	ENST00000375401	CCDS14351.1	chrX:53220503-53254604	4683
KDM5C		NM_001146702	ENST00000452825	CCDS55417.1	chrX:53220503-53254604	94
KDM6A	300128	NM_021140	ENST00000377967	CCDS14265.1	chrX:44732421-44971857	4206
KDM6A		NM_001291416	ENST00000382899		chrX:44732421-44971857	156
KIAA1033 (WASHC4)	605837	NM_015275	ENST00000332180	CCDS41826.1	chr12:105501492-105562906	3522
KIF11	148760	NM_004523	ENST00000260731	CCDS7422.1	chr10:94352825-94415152	3171
KIF1A	601255	NM_001244008	ENST00000498729	CCDS58757.1	chr2:241653181-241759725	5376
KIF1A		NM_001330289	ENST00000431776		chr2:241653181-241759725	27
KIF5C	604593	NM_004522	ENST00000435030		chr2:149632792-149883273	2874
KIF7	611254	NM_198525	ENST00000394412	CCDS32325.2	chr15:90171201-90198682	4032
KIRREL3	607761	NM_032531	ENST00000525144	CCDS53723.1	chr11:126293396-126870766	2337
KIRREL3		NM_001161707	ENST00000525704	CCDS55796.1	chr11:126300837-126870766	107
KLF7	604865	NM_003709	ENST00000309446	CCDS2373.1	chr2:207938862-208030740	909
KLF7		NM_001270943	ENST00000421199	CCDS59440.1	chr2:207938862-208031970	3
KLF7		NM_001270944	ENST00000412414	CCDS59438.1	chr2:207938862-207998861	18
KLHL15	300980	NM_030624	ENST00000328046	CCDS35217.1	chrX:24001833-24045303	1815
KMT2A	159555	NM_001197104	ENST00000534358	CCDS55791.1	chr11:118307205-118397539	11919
KMT2D	602113	NM_003482	ENST00000301067	CCDS44873.1	chr12:49412758-49449107	16614
KPTN	615620	NM_007059	ENST00000338134	CCDS42583.1	chr19:47978398-47987521	1311
LAMA1	150320	NM_005559	ENST00000389658	CCDS32787.1	chr18:6941743-7117813	9228
LAMP2	309060	NM_001122606	ENST00000434600	CCDS48159.1	chrX:119560003-119603204	1236
LAMP2		NM_002294	ENST00000200639	CCDS14599.1		140
LAMP2		NM_013995	ENST00000371335	CCDS14600.1	chrX:119570349-119603204	140
LARP7	612026	NM_001267039	ENST00000509061	CCDS58924.1	chr4:113558120-113578748	1770
LAS1L	300964	NM_031206	ENST00000374811	CCDS14381.1	chrX:64732462-64754686	2205
LIMK1	601329	NM_002314	ENST00000336180	CCDS5563.1	chr7:73498107-73536855	1944
LIMK1		NM_001204426	ENST00000538333	CCDS56491.1	chr7:73507486-73536855	50
LINGO1	609791	NM_032808	ENST00000355300	CCDS45313.1	chr15:77905366-77924869	1863
LINS1	610350	NM_001040616	ENST00000314742	CCDS10385.1	chr15:101109428-101142445	2274
LRP2	600073	NM_004525	ENST00000263816	CCDS2232.1	chr2:169983619-170219122	13968
MAF	177075	NM_005360	ENST00000326043	CCDS10928.1	chr16:79627745-79634622	1212
MAGEL2	605283	NM_019066	ENST00000532292		chr15:23888696-23892993	3750
MAGT1	300715	NM_032121	ENST00000358075	CCDS14436.2	chrX:77081862-77151065	1104
MAN1B1	604346	NM_016219	ENST00000371589	CCDS7029.1	chr9:139981379-140003639	2100
MANBA	609489	NM_005908	ENST00000226578	CCDS3658.1	chr4:103552643-103682151	2640
MAOA	309850	NM_000240	ENST00000338702	CCDS14260.1	chrX:43514155-43606071	1584
MASP1	600521	NM_001879	ENST00000337774	CCDS33907.1	chr3:186933873-187009810	2100
MASP1		NM_139125	ENST00000296280	CCDS33908.1	chr3:186933870-187009810	884
MASP1		NM_001031849	ENST00000169293	CCDS33909.1	chr3:186933873-187009810	53
MBD5	611472	NM_018328	ENST00000407073	CCDS33302.1	chr2:148778580-149271044	4485
MBOAT7	606048	NM_024298	ENST00000245615	CCDS12883.1	chr19:54677106-54693733	1419
MBTPS2	300294	NM_015884	ENST00000379484	CCDS14201.1	chrX:21857656-21903541	1560
MCPH1	607117	NM_024596	ENST00000344683	CCDS43689.1	chr8:6264113-6501140	2508
MECP2	300005	NM_001110792	ENST00000453960	CCDS48193.1	chrX:153295686-153363188	1497
MECP2		NM_004992	ENST00000303391	CCDS14741.1	chrX:153287264-153363188	26
MED12	300188	NM_005120	ENST00000333646	CCDS43970.1	chrX:70338406-70362304	6537
MED13L	608771	NM_015335	ENST00000281928	CCDS9177.1	chr12:116396381-116714991	6633
MED17	603810	NM_004268	ENST00000251871	CCDS8295.1	chr11:93517405-93546496	1956
MED23	605042	NM_004830	ENST00000368068	CCDS5147.1	chr6:131907878-131949379	4107
MED23		NM_015979	ENST00000354577	CCDS5146.1	chr6:131895106-131949379	21
MED23		NM_001270522	ENST00000368060	CCDS59039.1	chr6:131907878-131949379	18
MED25	610197	NM_030973	ENST00000312865	CCDS33075.1	chr19:50321536-50340237	2244
MEF2C	600662	NM_002397	ENST00000437473	CCDS47245.1	chr5:88014058-88179283	1422
MEF2C		NM_001193347	ENST00000340208	CCDS54878.1	chr5:88014058-88199922	138
METTL23	615262	NM_001080510	ENST00000341249	CCDS45787.1	chr17:74722912-74729963	573
MID1	300552	NM_000381	ENST00000317552	CCDS14138.1	chrX:10413350-10588674	2004
MSL3	300609	NM_078629	ENST00000312196	CCDS14147.1	chrX:11776278-11793872	1566
MSL3		NM_001193270	ENST00000398527	CCDS55369.1	chrX:11776701-11793872	66
MSL3		NM_078628	ENST00000337339	CCDS14148.1	chrX:11776278-11786096	80
MYT1L	613084	NM_015025	ENST00000428368	CCDS46222.1	chr2:1795014-2334888	3555
MYT1L		NM_001329849	ENST00000399157		chr2:1792885-2335029	27
NAA10	300013	NM_003491	ENST00000464845	CCDS14737.1	chrX:153195280-153200607	708
NALCN	611549	NM_052867	ENST00000251127	CCDS9498.1	chr13:101706130-102068813	5217
NCOR2	600848	NM_006312	ENST00000405201	CCDS41858.2	chr12:124808957-125052010	7545
NDP	300658	NM_000266	ENST00000378062	CCDS14262.1	chrX:43808024-43832921	794
NDST1	600853	NM_001543	ENST00000261797	CCDS34277.1	chr5:149887674-149937773	2649
NEXMIF	300524	NM_001008537	ENST00000055682	CCDS35337.1	chrX:73952691-74145287	4551
NF1	613113	NM_001042492	ENST00000358273	CCDS42292.1	chr17:29421945-29704695	8520
NF1		NM_001128147	ENST00000431387	CCDS45645.1	chr17:29421945-29549782	61
NFIX	164005	NM_002501	ENST00000397661	CCDS45996.1	chr19:13106584-13209610	1326
NFIX		NM_001271043	ENST00000592199		chr19:13135395-13209610	199
NFIX		NM_001271044	ENST00000587760	CCDS59359.1	chr19:13134785-13209610	3
NHS	300457	NM_198270	ENST00000380060	CCDS14181.1	chrX:17393543-17754113	4893
NHS		NM_001136024	ENST00000398097	CCDS48087.1	chrX:17653413-17754113	97
NIPBL	608667	NM_133433	ENST00000282516	CCDS3920.1	chr5:36876861-37065921	8415
NIPBL		NM_015384	ENST00000448238	CCDS47198.1	chr5:36876861-37065921	45
NLGN3	300336	NM_181303	ENST00000358741	CCDS55441.1	chrX:70364681-70391051	2547
NLGN4X	300427	NM_020742	ENST00000275857	CCDS14126.1	chrX:5808067-6145888	2451
NONO	300084	NM_007363	ENST00000276079	CCDS14410.1	chrX:70503042-70521018	1416
NR2F1	132890	NM_005654	ENST00000327111	CCDS4068.1	chr5:92919043-92930315	1272
NRXN1	600565	NM_001135659	ENST00000404971	CCDS46282.1	chr2:50145643-51259674	4644
NRXN1		NM_138735	ENST00000342183	CCDS1845.1		258
NSD1	606681	NM_022455	ENST00000439151	CCDS4412.1	chr5:176560833-176727214	8091
NSDHL	300275	NM_015922	ENST00000370274	CCDS14717.1	chrX:151999511-152037907	1122
NSUN2	610916	NM_017755	ENST00000264670	CCDS3869.1	chr5:6599352-6633473	2304
OCRL	300535	NM_000276	ENST00000371113	CCDS35393.1	chrX:128674252-128726530	2706
OFD1	300170	NM_003611	ENST00000340096	CCDS14157.1	chrX:13752832-13787480	3039
OPHN1	300127	NM_002547	ENST00000355520	CCDS14388.1	chrX:67262186-67653299	2309
PACS1	607492	NM_018026	ENST00000320580	CCDS8129.1	chr11:65837824-66012218	2892
PACS2	610423	NM_001100913	ENST00000458164	CCDS45178.2	chr14:105780752-105864484	2715
PAFAH1B1	601545	NM_000430	ENST00000397195	CCDS32528.1	chr17:2496923-2588909	1233
PAK3	300142.	NM_001128168	ENST00000360648	CCDS48151.1	chrX:110366305-110464173	1743
PAX6	607108	NM_001604	ENST00000419022	CCDS31452.1	chr11:31806340-31832901	1311
PCDH19	300460	NM_001184880	ENST00000373034	CCDS55462.1	chrX:99546642-99665271	3447
PDHA1	300502	NM_001173454	ENST00000379806	CCDS55380.1	chrX:19362011-19379825	1287
PGAP1	611655	NM_024989	ENST00000354764	CCDS2318.1	chr2:197697728-197791454	2769
PGAP2	615187	NM_001256236	ENST00000396991		chr11:3829766-3847601	1119
PGAP2		NM_001256235	ENST00000528216		chr11:3818954-3847601	85
PGAP2		NM_001256237	ENST00000464261		chr11:3819049-3847601	79
PGAP2		NM_001283039	ENST00000532523			128
PGAP3	611801	NM_033419	ENST00000300658	CCDS32641.1	chr17:37827375-37844323	963
PGK1	311800	NM_000291	ENST00000373316	CCDS14438.1	chrX:77359666-77382324	1254
PHF6	300414	NM_001015877	ENST00000370803	CCDS14639.1	chrX:133507342-133562822	1098
PHF6		NM_032335	ENST00000370800	CCDS14640.1	chrX:133507342-133549321	102
PHF8	300560	NM_001184896	ENST00000357988	CCDS55420.1	chrX:53963113-54071569	3183
PHF8		NM_001184897	ENST00000338946	CCDS55418.1	chrX:53963113-54070607	79
PHF8		NM_001184898	ENST00000322659	CCDS55419.1	chrX:53969048-54069627	79
PHIP	612870	NM_017934	ENST00000275034	CCDS4987.1	chr6:79644136-79788015
PIGA	311770	NM_002641	ENST00000333590	CCDS14165.1	chrX:15337573-15353676	1455
PIGA		NM_020473	ENST00000542278	CCDS48086.2	chrX:15337573-15353676	13
PIGC	601730	NM_002642	ENST00000258324	CCDS1302.1	chr1:172410597-172413230	894
PIGG	616918	NM_001127178	ENST00000453061	CCDS46992.1	chr4:492989-533710	2952
PIGG		NM_001289053	ENST00000509768		chr4:492989-516632	96
PIGL	605947	NM_004278	ENST00000225609	CCDS11176.1	chr17:16120509-16229573	759
PIGO	614730	NM_032634	ENST00000378617	CCDS6575.1	chr9:35088685-35096546	3270
PIGT	610272	NM_015937	ENST00000279036	CCDS13353.1	chr20:44044707-44054885	1737
PIGV	610274	NM_017837	ENST00000078527	CCDS287.1	chr1:27114454-27124894	1482
PLP1	300401	NM_001128834	ENST00000418604	CCDS14513.1	chrX:103031439-103047547	834
PMM2	601785	NM_000303	ENST00000268261	CCDS10536.1	chr16:8891670-8943194	741
POGZ	614787	NM_015100	ENST00000271715	CCDS997.1	chr1:151375200-151431941	4233
POMGNT1	606822	NM_001243766	ENST00000371992	CCDS57995.1	chr1:46654353-46685977	2247
POMGNT1		NM_001290129	ENST00000535522		chr1:46654353-46663171	55
PORCN	300651	NM_203475	ENST00000537758	CCDS14299.1	chrX:48367347-48379202	1386
PPM1D	605100	NM_003620	ENST00000305921	CCDS11625.1	chr17:58677544-58743640	1818
PPP1CB	600590	NM_002709	ENST00000395366	CCDS33169.1	chr2:28974626-29025806	984
PPP2R1A	605983	NM_014225	ENST00000322088	CCDS12849.1	chr19:52693055-52729678	1770
PPP2R5D	601646	NM_006245	ENST00000485511	CCDS4878.1	chr6:42952237-42980083	1809
PQBP1	300463	NM_001032381	ENST00000376563	CCDS14309.1	chrX:48755195-48760420	798
PRMT7	610087	NM_019023	ENST00000339507	CCDS10866.1	chr16:68344877-68391169	2079
PRPS1	311850	NM_002764	ENST00000372435	CCDS14529.1	chrX:106871654-106894256	957
PRRT2	614386	NM_001256442	ENST00000567659	CCDS58445.1	chr16:29823409-29827202	1185
PRRT2		NM_001256443	ENST00000300797	CCDS58446.1	chr16:29823409-29827202	21
PRSS12	606709	NM_003619	ENST00000296498	CCDS3709.1	chr4:119201193-119273922	2628
PSMD12	604450	NM_002816	ENST00000356126	CCDS11669.1	chr17:65334032-65362743	1371
PTCHD1	300828	NM_173495	ENST00000379361	CCDS35215.2	chrX:23352985-23414918	2667
PTEN	601728	NM_000314	ENST00000371953	CCDS31238.1	chr10:89623195-89728532	1212
PTPN11	176876	NM_002834	ENST00000351677	CCDS9163.1	chr12:112856536-112947717	1782
PUF60	604819	NM_078480	ENST00000526683	CCDS47934.1	chr8:144898514-144911556	1680
QARS	603727	NM_005051	ENST00000306125	CCDS2788.1	chr3:49133365-49142562	2328
RAB18	602207	NM_021252	ENST00000356940	CCDS7155.1	chr10:27793103-27831166	621
RAB18		NM_001256410	ENST00000423465		chr10:27793103-27831166	87
RAB39B	300774	NM_171998	ENST00000369454	CCDS14766.1	chrX:154487519-154493874	642
RAB3GAP1	602536	NM_001172435	ENST00000442034	CCDS54402.1	chr2:135809835-135928279	2967
RAB3GAP2	609275	NM_012414	ENST00000358951	CCDS31028.1	chr1:220321610-220445843	4182
RAB40AL	300405	NM_001031834	ENST00000218249	CCDS35353.1	chrX:102192200-102193228	837
RAC1	602048	NM_018890	ENST00000356142	CCDS5349.1	chr7:6414126-6443598	636
RAD21	606462	NM_006265	ENST00000297338	CCDS6321.1	chr8:117858173-117887105	1896
RAI1	607642	NM_030665	ENST00000353383	CCDS11188.1	chr17:17584787-17714765	5721
RBM10	300080	NM_001204468	ENST00000377604		chrX:47004617-47046214	2988
RERE	605226	NM_012102	ENST00000337907	CCDS95.1	chr1:8412464-8877699	4701
RGS7	602517	NM_002924	ENST00000366565	CCDS31071.1	chr1:240938814-241520530	1464
RGS7		NM_001282775	ENST00000366563	CCDS60459.1	chr1:240938814-241520530	75
RHEB	601293	NM_005614	ENST00000262187	CCDS5927.1	chr7:151163098-151217010	555
RLIM	300379	NM_016120	ENST00000332687	CCDS14427.1	chrX:73802811-73834461	1875
RNF113A	300951	NM_006978	ENST00000371442	CCDS14589.1	chrX:119004495-119005791	1032
RPL10	312173	NM_006013	ENST00000424325	CCDS14746.1	chrX:153626571-153630680	645
RPS6KA3	300075	NM_004586	ENST00000379565	CCDS14197.1	chrX:20168029-20284750	2223
RUSC2	611053	NM_014806	ENST00000361226	CCDS35008.1	chr9:35489830-35561895	4551
SATB2	608148	NM_015265	ENST00000457245	CCDS2327.1	chr2:200134223-200335989	2202
SCN1A	182389	NM_001202435	ENST00000303395	CCDS54413.1	chr2:166845670-167005642	6030
SCN2A	182390	NM_021007	ENST00000283256	CCDS33314.1	chr2:166150341-166248820	6018
SCN2A		NM_001040143	ENST00000357398	CCDS33313.1		92
SCN8A	600702	NM_014191	ENST00000354534	CCDS44891.1	chr12:51985020-52206648	5943
SCN8A		NM_001330260	ENST00000550891		chr12:51985020-52206648	92
SERPINA7	314200	NM_000354	ENST00000372563	CCDS14518.1	chrX:105277190-105282718	1248
SETBP1	611060	NM_015559	ENST00000282030	CCDS11923.2	chr18:42260863-42648475	4791
SETBP1		NM_001130110	ENST00000426838	CCDS45859.1	chr18:42260138-42457379	189
SETD1A (KMT2F)	611052	NM_014712	ENST00000262519	CCDS32435.1	chr16:30968615-30995983	5124
SETD2	612778	NM_014159	ENST00000409792	CCDS2749.2	chr3:47057898-47205467	7695
SETD5	615743	NM_001080517	ENST00000402198	CCDS46741.1	chr3:9439403-9519838	4329
SETD5		NM_001292043	ENST00000402466		chr3:9439384-9519838	41
SHANK1	604999	NM_016148	ENST00000293441	CCDS12799.1	chr19:51165084-51220195	6486
SHANK2	603290	NM_012309	ENST00000338508		chr11:70313961-70935842	5553
SHANK2			ENST00000423696			21
SHANK2		NM_133266	ENST00000449833		chr11:70313961-70507945	60
SHANK3	606230	NM_033517	ENST00000262795		chr22:51113070-51171640	5244
SHANK3			ENST00000445220		chr22:51113070-51171641	52
SHROOM4	300579	NM_020717	ENST00000376020	CCDS35277.1	chrX:50334643-50557044	4482
SKI	164780	NM_003036	ENST00000378536	CCDS39.1	chr1:2160134-2241652	2187
SLC16A2	300095	NM_006517	ENST00000587091	CCDS14426.2	chrX:73641328-73753764	1620
SLC1A4	600229	NM_003038	ENST00000234256	CCDS1879.1	chr2:65216495-65251000	1599
SLC2A1	138140	NM_006516	ENST00000426263	CCDS477.1	chr1:43391046-43424847	1479
SLC35A3	605632	NM_012243	ENST00000370155	CCDS762.1	chr1:100435345-100492534	978
SLC35A3		NM_001271685	ENST00000370153	CCDS60204.1	chr1:100435992-100492534	108
SLC39A8	608732	NM_022154	ENST00000394833	CCDS3656.1	chr4:103182821-103266348	1383
SLC39A8		NM_001135147	ENST00000424970	CCDS47117.1	chr4:103172198-103266410	69
SLC6A1	137165	NM_003042	ENST00000287766	CCDS2603.1	chr3:11034420-11080935	1800
SLC6A17	610299	NM_001010898	ENST00000331565	CCDS30799.1	chr1:110693136-110744823	2184
SLC6A8	300036	NM_005629	ENST00000253122	CCDS14726.1	chrX:152953752-152962048	1908
SLC9A6	300231	NM_001042537	ENST00000370695	CCDS44003.1	chrX:135067586-135129428	2106
SLC9A9	608396	NM_173653	ENST00000316549	CCDS33872.1	chr3:142984064-143567373	1938
SMAD6	602931	NM_005585	ENST00000288840	CCDS10221.1	chr15:66994674-67074337	1491
SMAD6		NM_001142861	ENST00000338426	CCDS45287.1		34
SMARCA2	600014	NM_003070	ENST00000349721	CCDS34977.1	chr9:2015219-2193623	4773
SMARCA2		NM_001289400	ENST00000302401		chr9:2158456-2193623	99
SMARCA4	603254	NM_001128849	ENST00000358026		chr19:11071808-11172958	5040
SMARCB1	601607	NM_003073	ENST00000263121	CCDS13817.1	chr22:24129150-24176705	1158
SMARCE1	603111	NM_003079	ENST00000348513	CCDS11370.1	chr17:38783976-38804103	1236
SMC1A	300040	NM_006306	ENST00000322213	CCDS14352.1	chrX:53401070-53449677	3702
SMC3	606062	NM_005445	ENST00000361804	CCDS31285.1	chr10:112327449-112364392	3654
SMS	300105	NM_004595	ENST00000404933	CCDS14203.1	chrX:21958691-22012955	1101
SNAP25	600322	NM_003081	ENST00000304886	CCDS13109.1	chr20:10199446-10288068	621
SNAP25		NM_130811	ENST00000254976	CCDS13110.1	chr20:10199446-10288068	118
SNX14	616105	NM_153816	ENST00000314673	CCDS5004.1	chr6:86215215-86303874	2841
SOBP	613667	NM_018013	ENST00000317357	CCDS43488.1	chr6:107811317-107982513	2622
SON	182465	NM_138927	ENST00000356577	CCDS13629.1	chr21:34915344-34949820	7281
SON		NM_001291411	ENST00000381679		chr21:34915344-34931362	6
SON		NM_032195	ENST00000300278	CCDS13631.2	chr21:34915344-34932973	255
SOX11	600898	NM_003108	ENST00000322002	CCDS1654.1	chr2:5832799-5841517	1326
SOX3	313430	NM_005634	ENST00000370536	CCDS14669.1	chrX:139585152-139587225	1341
SOX5	604975	NM_006940	ENST00000451604	CCDS8699.1	chr12:23682438-24102637	2292
SOX5		NM_001261415	ENST00000545921	CCDS58217.1	chr12:23682438-24103966	8
SOX5		NM_178010	ENST00000396007	CCDS41761.1	chr12:23682438-23737546	6
SPATA5	613940	NM_145207	ENST00000274008	CCDS3730.1	chr4:123844225-124240604	2682
SPRED1	609291	NM_152594	ENST00000299084	CCDS32193.1	chr15:38545052-38649450	1335
SPTAN1	182810	NM_001130438	ENST00000372739	CCDS48036.1	chr9:131314837-131395944	7434
SRD5A3	611715	NM_024592	ENST00000264228	CCDS3498.1	chr4:56212388-56239266	957
SRPX2	300642	NM_014467	ENST00000373004	CCDS14471.1	chrX:99899163-99926296	1398
SSR4	300090	NM_006280	ENST00000370086	CCDS14731.1	chrX:153060019-153063967	522
ST3GAL3	606494	NM_174963	ENST00000262915	CCDS493.1	chr1:44173204-44396837	1335
STAG1	604358	NM_005862	ENST00000383202	CCDS3090.1	chr3:136055999-136471245	3777
STIL	181590	NM_001048166	ENST00000371877	CCDS41329.1	chr1:47715811-47779819	3867
STXBP1	602926	NM_003165	ENST00000299084	CCDS32193.1	chr9:130374486-130454995	1812
STXBP1		NM_001032221	ENST00000373299	CCDS35146.1	chr9:130374486-130454995	83
SYN1	313440	NM_006950	ENST00000295987	CCDS14280.1	chrX:47431300-47479256	2118
SYNCRIP	616686	NM_006372	ENST00000369622	CCDS5005.1	chr6:86323693-86353043	1872
SYNCRIP		NM_001159677	ENST00000355238	CCDS55041.1	chr6:86323693-86351169	42
SYNGAP1	603384	NM_006772	ENST00000418600	CCDS34434.2	chr6:33387847-33421466	4032
SYP	313440	NM_003179	ENST00000263233	CCDS14321.1	chrX:49044265-49056661	942
SZT2	615463	NM_015284	ENST00000562955	CCDS30694.2	chr1:43855556-43919918	10128
TAF1	313650	NM_001286074	ENST00000423759	CCDS69783.1	chrX:70586089-70685855	5688
TAF2	604912	NM_003184	ENST00000378164	CCDS34937.1	chr8:120743014-120845074	3600
TBC1D24	613577	NM_001199107	ENST00000293970	CCDS55980.1	chr16:2525147-2555734	1680
TBC1D7	612655	NM_016495	ENST00000379300	CCDS4523.1	chr6:13305184-13328815	882
TBC1D7		NM_001318806	ENST00000606370		chr6:13318946-13328815	195
TBCK	616899	NM_001163435	ENST00000273980	CCDS54788.1	chr4:106965474-107237423	2682
TBL1XR1	608628	NM_024665	ENST00000457928	CCDS46961.1	chr3:176738542-176915048	1545
TBR1	604616	NM_006593	ENST00000389554	CCDS33310.1	chr2:162272620-162281573	2049
TCF20	603107	NM_005650	ENST00000359486	CCDS14033.1	chr22:42556019-42679933	5883
TCF20		NM_181492	ENST00000335626	CCDS14032.1	chr22:42556019-42611347	18
TCF4	602272	NM_001243232	ENST00000544241	CCDS58627.1	chr18:52889562-53071226	94
TCF4		NM_001243231	ENST00000543082	CCDS58628.1	chr18:52889562-53178000	19
TCF4		NM_001243234	ENST00000457482	CCDS58624.1	chr18:52889562-52989090	190
TCF4		NM_001243236	ENST00000561831	CCDS58623.1	chr18:52889562-52969852	69
TCF4		NM_001243226	ENST00000398339	CCDS58631.1	chr18:52889562-53303188	2322
TCF4		NM_001243230	ENST00000566286	CCDS59321.1	chr18:52889562-53255860	66
TECR	610057	NM_138501	ENST00000215567	CCDS12313.1	chr19:14640379-14676792	927
TECR		NM_001321170	ENST00000436007		chr19:14640372-14676792	60
TELO2	611140	NM_016111	ENST00000262319	CCDS32363.1	chr16:1543352-1560460	2514
THOC2	300395	NM_001081550	ENST00000245838	CCDS43988.1	chrX:122734412-122866904	4782
THOC6	615403	NM_024339	ENST00000326266	CCDS10491.1	chr16:3074032-3077756	1026
TIMM8A	300356	NM_004085	ENST00000372902	CCDS14481.1	chrX:100600644-100603957	294
TLK2	608439	NM_001284333	ENST00000326270	CCDS62283.1	chr17:60556386-60692841	2319
TMCO1	614123	NM_019026	ENST00000367881	CCDS1251.2	chr1:165693528-165738159	720
TMEM135	616360	NM_022918	ENST00000305494	CCDS8280.1	chr11:86748886-87039876
TMEM240	607381	NM_001114748	ENST00000378733	CCDS44040.1	chr1:1470158-1475740	522
TMLHE	300777	NM_018196	ENST00000334398	CCDS14768.1	chrX:154718673-154842622	1266
TMLHE		NM_001184797	ENST00000369439	CCDS55547.1	chrX:154722196-154842622	136
TNIK	610005	NM_015028	ENST00000436636	CCDS46956.1	chr3:170776203-171178197	4083
TRAF7	606692	NM_032271	ENST00000326181	CCDS10461.1	chr16:2205799-2228130	2013
TRAPPC11	614138	NM_021942	ENST00000334690	CCDS34112.1	chr4:184580420-184634747	3402
TRAPPC9	611966	NM_031466	ENST00000389328	CCDS34946.1	chr8:140742586-141468678	3741
TRIO	601893	NM_007118	ENST00000344204	CCDS3883.1	chr5:14143811-14510313	9294
TRIP12	604506	NM_001284214	ENST00000389044	CCDS63146.1	chr2:230628553-230786725	6123
TRMT1	611669	NM_017722	ENST00000437766	CCDS12293.1	chr19:13215714-13227463	1980
TRMT10A	616013	NM_152292	ENST00000273962	CCDS3650.1	chr4:100467864-100484825	1020
TRPC5	300334	NM_012471	ENST00000262839	CCDS14561.1	chrX:111017542-111326004	2229
TSC1	605284	NM_000368	ENST00000298552	CCDS6956.1	chr9:135766735-135820020	3495
TSC2	191092	NM_000548	ENST00000219476	CCDS10458.1	chr16:2097990-2138713	5424
TSC2		NM_001318832	ENST00000568454		chr16:2098203-2138721	4
TSPAN7	300096	NM_004615	ENST00000378482	CCDS14248.1	chrX:38420731-38548172	750
TTI2	614426	NM_025115	ENST00000360742	CCDS6090.1	chr8:33356027-33370703	1527
TUBA1A	602529	NM_006009	ENST00000301071	CCDS8781.1	chr12:49578578-49583107	1356
TUBA1A		NM_001270399	ENST00000295766	CCDS58227.1	chr12:49578578-49583107	3
TUBB2B	612850	NM_178012	ENST00000259818	CCDS4485.1	chr6:3224495-3227968	1138
TUBB3	602661	NM_006086	ENST00000315491	CCDS10988.1	chr16:89989687-90002505	1353
TUBG1	191135	NM_001070	ENST00000251413	CCDS11433.1	chr17:40761358-40767256	1356
TUSC3	601385	NM_006765	ENST00000503731	CCDS5994.1	chr8:15397596-15624158	1047
TUSC3		NM_178234	ENST00000382020	CCDS5993.1	chr8:15397596-15624158	16
UBE2A	312180	NM_003336	ENST00000371558	CCDS14580.1	chrX:118708430-118718392	459
UBE3B	608047	NM_130466	ENST00000342494	CCDS9129.1	chr12:109915428-109974510	3207
UBE3B		NM_001270449	ENST00000340074	CCDS58277.1	chr12:109915457-109928527	105
UBR1	605981	NM_174916	ENST00000290650	CCDS10091.1	chr15:43235098-43398286	5250
UNC80	612636	NM_032504	ENST00000439458	CCDS46504.1	chr2:210636717-210864024	9777
UPB1	606673	NM_016327	ENST00000326010	CCDS13827.1	chr22:24891251-24922553	1155
UPF3B	300298	NM_080632	ENST00000276201	CCDS14588.1	chrX:118967989-118986991	1452
USP27X	300975	NM_001145073	ENST00000508866	CCDS65260.1	chrX:49644470-49647168	1317
USP7	602519	NM_003470	ENST00000344836	CCDS32385.1	chr16:8985951-9057341	3309
USP7		NM_001286457	ENST00000381886	CCDS66941.1	chr16:8985951-9030586	31
USP9X	300072	NM_001039590	ENST00000324545	CCDS43930.1	chrX:40944888-41095832	7713
VLDLR	192977	NM_003383	ENST00000382100	CCDS6446.1	chr9:2621774-2656103	2622
VPS13B	607817	NM_017890	ENST00000358544	CCDS6280.1	chr8:100025494-100889814	12069
VPS13B		NM_152564	ENST00000357162	CCDS6281.1	chr8:100025494-100889814	67
VPS13B		NM_181661	ENST00000441350	CCDS47903.1	chr8:100025494-100133987	42
VPS13B		NM_015243	ENST00000355155	CCDS6283.1	chr8:100025494-100222015	77
WAC	615049	NM_016628	ENST00000354911	CCDS7159.1	chr10:28822421-28912041	1944
WASHC5	610657	NM_014846	ENST00000318410	CCDS6355.1	chr8:126036503-126104061	3480
WDR45	300526	NM_007075	ENST00000356463	CCDS14318.1	chrX:48932092-48958059	1086
WDR62	613583	NM_001083961	ENST00000401500	CCDS46059.1	chr19:36545783-36596012	4572
WDR73	616144	NM_032856	ENST00000434634	CCDS45339.1	chr15:85184726-85197574	1137
WWOX	605131	NM_016373	ENST00000566780	CCDS42196.1	chr16:78133310-79246564	1245
WWOX		NM_130791	ENST00000355860	CCDS42197.1	chr16:78133310-78312616	54
ZBTB18 (ZNF238)	608433	NM_205768	ENST00000358704	CCDS1622.1	chr1:244214561-244220778	1596
ZC3H14	613279	NM_024824	ENST00000251038	CCDS32133.1	chr14:89029253-89079853	2211
ZC3H14		NM_207662	ENST00000318308	CCDS32136.1	chr14:89060730-89079853	385
ZC4H2	300897	NM_018684	ENST00000374839	CCDS14380.1	chrX:64135682-64196413	675
ZC4H2		NM_001178033	ENST00000447788	CCDS55432.1	chrX:64135682-64196413	19
ZDHHC9	300646	NM_016032	ENST00000357166	CCDS35395.1	chrX:128937264-128977910	1095
ZEB2	605802	NM_014795	ENST00000558170	CCDS2186.1	chr2:145141942-145277958	3645
ZMYM6	613567	NM_007167	ENST00000357182	CCDS387.2	chr1:35451767-35497569	3978
ZMYND11	608668	NM_006624	ENST00000381591	CCDS7052.2	chr10:180405-300577	1809
ZMYND11		NM_001330057	ENST00000381584		chr10:180424-300577	65
ZNF407	602401	NM_017757	ENST00000299687	CCDS45885.1	chr18:72342919-72777628	6747
ZNF407		NM_001146190	ENST00000309902	CCDS54191.1	chr18:72342919-72516583	106
ZNF41	314995	NM_007130	ENST00000313116	CCDS14279.1	chrX:47305561-47342345	2340
ZNF526	614387	NM_133444	ENST00000301215	CCDS12598.1	chr19:42724423-42731205	2013
ZNF674	300573	NM_001039891	ENST00000523374	CCDS48099.1	chrX:46357160-46404892	1746
ZNF711	314990	NM_021998	ENST00000373165	CCDS35344.1	chrX:84498997-84528368	2286
ZNF711		NM_001330574	ENST00000360700		chrX:84498997-84528368	140
ZNF81	314998	NM_007137	ENST00000338637	CCDS43933.1	chrX:47696301-47781655	1986
ZSWIM6	615951	NM_020928	ENST00000252744	CCDS47215.1	chr5:60628100-60841999	3648
